1 **Arterial hypertension and its covariates among nomadic Raute hunter-**  
2 **gatherers of Western Nepal: a mixed-method study**

3

4 Tapendra Koirala<sup>1,2\*</sup>, Udaya Bahadur BC<sup>3</sup>, Carmina Shrestha<sup>4</sup>, Ujjawal Paudel<sup>5,2</sup>, Rolina Dhital<sup>4</sup>,  
5 Sunil Pokharel<sup>6</sup>, Madhusudan Subedi<sup>7</sup>

6

7

8 **Affiliations**

9 <sup>1</sup> Dasharathpur Primary Health Care Center, Surkhet, Karnali Province, Nepal

10 <sup>2</sup> Ministry of Health and Population, Department of Health Services, Kathmandu, NP

11 <sup>3</sup> Public Health Service Office, Surkhet, Karnali Province, Nepal

12 <sup>4</sup> Health Action and Research, Kathmandu, Bagmati Province, Nepal

13 <sup>5</sup> Jibjibe Primary Health Care Center, Rasuwa, Bagmati Province, Nepal

14 <sup>6</sup> Independent Researcher, Kathmandu, Nepal

15 <sup>7</sup> Patan Academy of Health Sciences, Lalitpur, Bagmati Province, Nepal

16

17

18 **\* Corresponding author**

19 Tapendra Koirala, <sup>1</sup> Dasharathpur Primary Health Care Center, Surkhet, Karnali Province, Nepal

20 Email: tapendrakoira@gmail.com

## 1 **Abstract**

### 2 **Objectives**

3 To determine the prevalence of, and understand the factors associated with, hypertension among  
4 the nomadic Raute hunter-gatherers of Western Nepal.

### 5 **Design**

6 A mixed-method study.

### 7 **Setting**

8 The study was carried out at Raute temporary campsites in the Surkhet District of Karnali  
9 Province between May to September 2021.

### 10 **Participants**

11 The questionnaire-based survey included all males and non-pregnant females of the nomadic  
12 Raute group aged 15 years and above. In-depth interviews were conducted among purposively  
13 selected 15 Raute participants and four non-Raute key informants to help explain and enrich the  
14 quantitative findings.

### 15 **Outcome measures**

16 The prevalence of hypertension (defined as brachial artery blood pressure of systolic  $\geq 140$  mm  
17 Hg and/or diastolic  $\geq 90$  mm Hg) and its socio-demographic, anthropometric, and behavioral  
18 covariates.

### 19 **Results**

20 Of the 85 eligible participants, 81 [median age 35 years (interquartile range: 26–51), 46.9%  
21 female] were included in the final analysis. Hypertension was found in 10.5% of females, 48.8%  
22 of men, and 30.9% of the total population. Current alcohol and tobacco use were high (91.4%

1 and 70.4%, respectively), with concerning high rates among youths. Males, older people, current  
2 drinkers, and current tobacco users were more likely to have hypertension. Our qualitative  
3 analysis suggests that the traditional forest-based Raute economy is gradually transitioning into a  
4 cash-based one that heavily relies on government incentives. Consumption of commercial foods,  
5 drinks, and tobacco products is increasing as their market involvement grows.

## 6 **Conclusion**

7 This study found a high burden of hypertension, alcohol, and tobacco use among nomadic Raute  
8 hunter-gatherers facing socioeconomic and dietary transitions. Further research is needed to  
9 assess the long-term impact of these changes on their health. This study is expected to help  
10 appraise concerned policymakers of an emerging health concern and formulate context-specific  
11 and culturally sensitive interventions to limit hypertension-related morbidities and mortalities in  
12 this endangered population.

## 13 **Keywords**

14 Hunter-gatherers, Foragers, Hypertension, Blood pressure, Cardiovascular disease, Socio-  
15 economic transition, Nomadic Raute

16

## 1 **Strengths and limitations of this study**

- 2       • This is the first study to report the prevalence of hypertension and its covariates among  
3       the nomadic Raute hunter-gatherers of Nepal.
- 4       • The major strengths of this study are the use of a mixed-method design to have both  
5       quantitative and qualitative perspectives, near total population enrollment, and robust  
6       methodology.
- 7       • The cross-sectional design of this study limits its ability to establish causal relationships  
8       between the variables.
- 9       • Several important factors, such as dietary fruits and vegetable consumption, salt intake,  
10      and level of physical activities, as well as the presence of diabetes mellitus, dyslipidemia,  
11      or central obesity, were not assessed, preventing this study from determining the  
12      community's actual cardiovascular disease risk.
- 13      • Interviews taken in language non-native (Nepali) to the Raute may be subject to language  
14      bias.

15

16



## 1 **Introduction**

2 Hunting-gathering is one of the oldest modes of subsistence, where most or all food is obtained  
3 through foraging edible plants and hunting wild animals.[1] Hunter-gatherers (HGs) were  
4 estimated to account for about 1 percent of the world’s population in the 1960s.[2] As a result of  
5 rapid population growth, transformations of habitat, and globalization, the population of  
6 traditional HG communities have rapidly declined.[3,4] Currently, only a handful of  
7 communities are considered “pure HGs”, while many have transitioned either to agriculture,  
8 pastoralism, or to a mixed economy where other adaptive strategies supplement foraging.[5,6]  
9 HGs and other small-scale populations living traditionally are found to have a low prevalence of  
10 type 2 diabetes mellitus, hypertension, and obesity.[7,8] Their remarkable cardiovascular health  
11 is often linked to their high level of physical activity; low glycemic index diet, rich in fibers and  
12 micronutrients; and limited access to processed and high caloric modern foods.[9,10] Evidence  
13 has shown the emergence of obesity, diabetes, atherosclerosis, and other lifestyle-related diseases  
14 among the former HGs as they transitioned from traditional to Western lifestyles.[11,12] Health  
15 research in HGs has much to offer to modern medicine and public health. Knowledge of the  
16 interactions between health and lifestyle, diet, and health behavior among diverse traditional  
17 populations can aid in our understanding of several non-communicable diseases (NCDs) that  
18 plague modern societies. Inspired by HG research, several studies, including randomized  
19 controlled trials, have studied the role of HG or paleolithic diets in various NCDs, from obesity,  
20 hypertension, diabetes, and dyslipidemia to multiple sclerosis among the general population.[13]  
21 However, HG’s health has not been extensively studied worldwide, and there is still a dearth of  
22 data on the impact of HG’s lifestyle choices on their health, particularly their cardiovascular and  
23 metabolic health. Studies from the mid-to-late 20th century constitute a sizable portion of the

1 existing research on HG's health.[8,9,11,14–16] Additionally, most studies focus  
2 disproportionately on HG societies in South America and Sub-Saharan Africa. Asians, South  
3 Asian HG societies, in particular, are overtly underrepresented in research scrutiny. Only a  
4 handful of studies have explored the health and well-being of South Asian HGs. Data on the  
5 cardiovascular and metabolic health of contemporary HG populations in this entire region is  
6 almost non-existent, and Nepal is no exception.

7 Cardiovascular disease (CVD) is among the leading cause of preventable death globally. Raised  
8 blood pressure (BP) or hypertension is one of the strongest modifiable risk factors for CVDs.  
9 Approximately 34% of men and 32% of women aged 30–79 years worldwide, as well as 30% of  
10 men and 20% of women aged 15–69 years in Nepal, were estimated to have hypertension in  
11 2019.[17,18] Nevertheless, despite being the most representative of the available large-scale  
12 data, estimates from current national-level public health surveys are said to be significantly  
13 under-representative of ethnic minorities and difficult-to-reach mobile and migrant sub-  
14 populations.[19,20] Furthermore, due to their unique lifestyle, diet, and behavior-related risks,  
15 the nationally representative data cannot be generalized to special sub-populations/groups.

16 Here, we present a distinctive group of Nepalese nomadic hunter-gatherers with a unique set of  
17 lifestyle, tradition, language, and socio-cultural values who continue to live their traditional life,  
18 migrating from one place to another regularly gathering wild foods and bartering their carved  
19 woodenware for the grains and other necessities from the settled villagers. The Rautes, a  
20 population apparently on the verge of extinction, is Nepal's last remaining nomadic hunter-  
21 gatherer. Since their existence was first documented in 1955, the Raute ethnography has been  
22 extensively studied by scholars worldwide. However, the Rautes' health remains scientifically  
23 unexplored, especially their cardiovascular and metabolic health. Although anecdotal evidence

1 suggests socio-economic transition, changing health behaviors, and deterioration in the general  
2 health of the Rautes, no scientific studies have explored the magnitude of such change and their  
3 impact on their health. Therefore, in an attempt to understand the state of their cardiovascular  
4 health, this study aims to determine the prevalence of hypertension and understand the socio-  
5 demographic, anthropometric, and behavioral factors associated with hypertension among  
6 nomadic Raute hunter-gatherers of Western Nepal.

7

## 8 **Methods**

### 9 **Study design**

10 This study adopted an explanatory sequential mixed methods design. A quantitative study  
11 designed to determine the prevalence and factors associated with hypertension was followed by a  
12 qualitative study to understand, explain and enrich the quantitative findings.

### 13 **Study population**

14 The Raute is a small group of highly migratory, egalitarian hunter-gatherers that exclusively  
15 hunts Rhesus and Langur monkeys, forages edible roots, fruits, and herbs, carves woodenwares,  
16 and trades them with the settled villagers for grains, clothes, and other necessities.[16,21] Rautes  
17 strongly opposes any idea of permanent settlement, agricultural practices, and formal education.  
18 They are uninterested in new technologies and sophisticated gadgets and have little desire to save  
19 or store items.[22] The Raute primarily inhabits forested areas and riverbanks of the mid-western  
20 part of the country. They alternate their habitat between higher altitudes (6000-10000 ft) in  
21 monsoon-summer months (April to September) and lower altitudes (2000-4500 ft) in winter  
22 (October to March).[16,22,23] Their customary periodic migration is a complex function of their

1 socio-cultural belief system, environmental conditions, availability of forest resources, prospects  
2 for trade, and relations with locals.[16,22,24] ‘Khamchi’, a Tibeto-Burman language, is their  
3 mother tongue, although they are fluent in the local Nepali language.[23] Their current economy  
4 is based on forest resources, trade, and state incentives.[22]

## 5 **Study site and setting**

6 Karnali province, the main home of the nomadic Rautes, is the largest but least populated of all  
7 the seven provinces of Nepal, with a population of about 1.5 million, a literacy rate of 62.77%,  
8 and a human developmental index score of 0.427. The province comprises ten districts, Surkhet  
9 being the provincial capital.[25] Districts such as Kalikot, Dailekh, Surkhet, Salyan, and Jajarkot  
10 are among the most frequently, although not exclusively, inhabited places by the Rautes. At the  
11 time of the commencement of this study, the population had been migrating through the District  
12 Surkhet. The study was completed in two phases between May to September 2021, following the  
13 Raute through their six successive campsites within the territories of Lekbeshi and Gurbhakot  
14 Municipalities of the District Surkhet (Figure 1).

### 15 **Figure 1**

16 Study area map showing temporary Raute settlements (camps) and the data collection sites.  
17 Maps were created exclusively for the study using the QGIS version 3.28.0, and the GPS  
18 coordinates were taken from the study sites. (Data source: Shapefiles, Survey Department,  
19 Government of Nepal, <http://nationalgeoportals.gov.np>; Basemap, OpenStreetMaps contributors,  
20 <https://www.openstreetmap.org>)

21

## 22 **Participants selection**

23 For the quantitative study, all willing individuals aged 15 years and above belonging to the  
24 nomadic Raute population were considered eligible. Participants with suspected COVID-19 and

1 pregnant females were excluded from the study (Supplemental Figure 1). Since the entire eligible  
2 population was included, the sampling was deemed unnecessary.

3 Participants for the qualitative study were purposively selected: In-depth interviews (IDIs) were  
4 conducted among 15 (10 males and five females) Raute adults with and without hypertension.  
5 Four key informant interviews (KIIs) were conducted among a healthcare worker, two social  
6 workers, and an expert in the field. The participants for the interviews were selected so that each  
7 would bring a unique perspective, thereby maximizing demographic and experiential  
8 heterogeneity within the group. Interviews were conducted among Raute participants and  
9 outsiders to achieve a balanced perspective. We stopped taking further interviews when data  
10 obtained from respondents was repetitive or no new information was forthcoming.

11

## 12 **Data Collection**

13 Quantitative data were collected through a structured questionnaire which included: face-to-face  
14 interviews, anthropometric measurements, and clinical examinations. Four health workers (2  
15 Health assistants and 2 Public health nurses) were recruited and trained for data collection. They  
16 were supervised by the principal investigator (TK) and co-investigators (CS & UP) during data  
17 collection. We used standard methods to obtain quantitative measurements.[26] The data was  
18 collected at participants' residences at their convenience by the data enumerators of their  
19 respective sexes.

20 Qualitative data collected through interviews (IDIs and KIIs) were taken face-to-face by two  
21 interviewers, UBB (MA) and TK (MBBS), using interview guides. UBB is a male public health  
22 expert with more than ten years of experience. TK is a male medical graduate with over five  
23 years of clinical and research experience. Interviewers had a keen interest in non-communicable

1 diseases and their risk factors. They didn't have any obvious bias or assumptions toward study  
2 participants. A brief informal discussion was carried out with each participant to establish  
3 rapport and facilitate participation. Every participant was informed about the aims of the study,  
4 the researcher's personal goal, and the reason for conducting this study. All the participants  
5 approached for the study consented to participate, and there was no drop-out. Each of the IDIs  
6 lasted for approximately an hour and was audio-recorded. No repeat interviews were conducted  
7 with any participants. The interviewers made field notes during the data collection.

8 All the interviews, measurements, and clinical examinations were carried out, taking necessary  
9 precautions against COVID-19 transmission. The data enumerators and interviewers were tested  
10 for COVID-19 before and after carrying out data collection. During data collection, all  
11 researchers wore masks, face shields, and gloves, while all the participants were given masks and  
12 kept at a distance of at least one meter unless required to do otherwise.

### 13 **Tools and instruments**

#### 14 *Survey tool*

15 To collect quantitative data, a structured questionnaire was adapted from validated tools for  
16 various national-level surveys and other relevant literature.[18,27,28] The questionnaire was  
17 tailored according to the local context (Supplemental File 1). The questionnaire collected  
18 information on participant's socio-demographic characteristics (age, sex, marital status,  
19 educational status, and primary occupation), health-related behaviors (alcohol consumption and  
20 tobacco use), awareness and treatment of hypertension, physical measurements (height, weight,  
21 body mass index (BMI) and BP). Physical measurements were taken by trained enumerators  
22 according to established guidelines.[26] Bodyweight in kilograms was measured to the nearest  
23 0.2 kg using a well-calibrated standardized digital weighing scale (Seca, Hangzhou, China).

1 Height was recorded to the nearest 0.1 cm using well-calibrated standardized portable  
2 stadiometers (Seca, Hangzhou, China). Weight and height measurements were performed  
3 without shoes, headgear, or heavy clothing. BMI was calculated as weight in kilograms (kg)  
4 divided by height in meters squared (m<sup>2</sup>). BP measurements were performed using a well-  
5 calibrated digital automatic BP monitor (OMRON M6, Japan) with a universal cuff after the  
6 participants rested quietly for 15 minutes with their legs uncrossed. Each of the three BP  
7 readings was taken with participants requested to rest for three minutes in between. The mean of  
8 the second and third readings was taken for further analysis.

### 9 ***Interview guides***

10 To collect qualitative data, we developed guides for IDIs and KIIs based on themes identified in  
11 the quantitative study. We also explored additional themes not captured in the quantitative study  
12 (Supplemental File 2).

### 13 ***Validation of tools***

14 The survey questionnaire and interview guides were designed in English and translated into  
15 Nepali by the experts. The tools were then back-translated into English by a panel that speaks  
16 both languages for validation before administration. The structured survey questionnaire was  
17 pretested among 8 Raute participants (10% of the total sample size) who were excluded from the  
18 final analysis. Similarly, the interview guides for IDI and KII were also pretested among 3 Raute  
19 participants and one key informant before their administration.

### 20 **Operational Definitions**

21 Operational definitions were adopted for the key variables to maintain uniformity and  
22 consistency. Hypertension was defined and categorized based on the JNC 7

1 recommendations.[29] Details on operational definitions of the other study variables are given in  
2 the online Supplemental file 3.

### 3 **Data management and analysis**

#### 4 *Quantitative data*

5 We used descriptive statistics such as median and interquartile range (IQR) for the continuous  
6 numerical variables and frequencies and proportions for the categorical variables to summarize  
7 our findings. All the data were analyzed in SPSS (IBM) version 23 and visualized on R version  
8 4.1.3. Maps were created by using QGIS version 3.28.0.

#### 9 *Qualitative data*

10 For qualitative analysis, the audio recordings of IDIs and KIIs were transcribed verbatim in  
11 Nepali and then translated into English by the two investigators, TK and CS, independently. All  
12 the transcripts were imported to the Dedoose version 8.2.14 (SocioCultural Research  
13 Consultants, LLC, Los Angeles, CA). Two investigators, TK and RD, independently reviewed  
14 and coded the transcripts. Codes were compared, and the disagreements were resolved by  
15 consensus. All codes were merged into similar categories, which were further developed into  
16 major themes inductively. The data acquired through KIIs, IDIs, and the quantitative study was  
17 triangulated during the final analysis. We did not return the transcripts to the participants due to  
18 logistical difficulties in finding highly migratory participants and their low literacy.

#### 19 *Data management*

20 Participants' personal health information (PHI) was protected on researchers' fully encrypted  
21 devices with procedures for the deidentification of data during analysis, and no PHI was linked



1 to geospatial data in the public domain. To ensure the credibility of the analysis, all procedures  
2 were supervised by research experts in the field.

### 3 **Patient and public involvement**

4 Raute participants were included during pretesting of quantitative and qualitative tools. Their  
5 feedback was incorporated accordingly. Raute chieftain coordinated with researchers to help  
6 them gather the necessary data. Social workers and relevant public health authorities will help  
7 disseminate the results to the participants.

8

9

## 1 **Results**

### 2 **Quantitative results**

#### 3 *Population characteristics*

4 Of the total 85 eligible participants, 81 participants between 15 to 69 years of age were included  
5 in the final quantitative analysis (Supplemental Figure 1). The non-response rate was 2.4%.  
6 Table 1 Summarizes the key population characteristics of this study. The median age of the  
7 participants was 35 years (IQR: 26–51), with a slight male predominance (53.1%, n=43). The  
8 majority of the participants were currently married (64.2%). Most males (90.7%) reported  
9 ‘carving and trading woodenware’ as their main occupation, while the majority (94.7%) of  
10 females reported being homemakers. None of the participants had received any formal education.  
11 High proportions of males (90.7%) and females (92.1%) currently consume alcohol. In the age  
12 group 15–24 years, more than 68% drank alcohol in the past 30 days (data not shown). Overall,  
13 more than 2/3<sup>rd</sup> of the participants currently uses tobacco products (81.4% males, 57.9%  
14 females). Approximately 42% of participants in the age group 15–24 years used some form of  
15 tobacco product in the preceding 30 days. The preference for tobacco products differed by  
16 gender; 87.5% of smokers were females, compared to 97.1% of smokeless tobacco users who  
17 were males.

18 Among females, the median weight was 44 kg (IQR: 42–48), and the median height was 152.3  
19 cm (IQR: 142.2–154.9). Among males, the median weight was 51 kg (IQR: 46–58), and the  
20 median height was 154.9 cm (IQR: 152.4–158.0). The Median BMI for the population was 21.1  
21 (IQR: 19.2–22.9) kg/m<sup>2</sup>. About 17% of the participants were underweight (BMI <18.5 kg/m<sup>2</sup>),

1 and 8.6% were overweight (BMI 25 to <30 kg/m<sup>2</sup>). None of the participants were found obese  
2 (BMI≥30 kg/m<sup>2</sup>).

3 For females, the medians for systolic blood pressure (SBP) and diastolic blood pressure (DBP)  
4 were 122.5 (IQR: 118–132) and 75 (IQR: 70–83) mm Hg, respectively. The same for males were  
5 135 (IQR: 128–153) and 86 (IQR: 79–90) mm of Hg, respectively. Medians for SBP, DBP, and  
6 MAP were all higher among males than females across all age groups (Table 1). We found  
7 extremely high recordings for SBPs and DBPs among a few participants aged 20 to 30. (Figure  
8 2, A and B). With that exception, in both sexes, the SBP increased steadily with age (Figure 2,  
9 A). In males, DBP and MAP both increased significantly with age until the age of 60, when the  
10 former began to decline (Figure 2, B and C). In females, DBP and MAP both decreased in early  
11 adulthood, followed by a moderate increase until the age of 60, after which the former started to  
12 decline.

13 Table 1

14 Socio-demographic characteristics, behavioral risk factors, anthropometric profile, and blood  
15 pressure of the nomadic Raute population by sex

| Variables                                                       | Female (n=38) |         | Male (n=43) |         | Total (N=81) |         |
|-----------------------------------------------------------------|---------------|---------|-------------|---------|--------------|---------|
|                                                                 | n             | (n %)   | n           | (n %)   | n            | (n %)   |
| <b>Age, years</b>                                               |               |         |             |         |              |         |
| Median (IQR)                                                    | 35            | (25–42) | 35          | (26–56) | 35           | (26–51) |
| 15–34                                                           | 19            | (50.0)  | 21          | (48.8)  | 40           | (49.4)  |
| 35–54                                                           | 14            | (36.8)  | 10          | (23.3)  | 24           | (29.6)  |
| ≥55                                                             | 5             | (13.2)  | 12          | (27.9)  | 17           | (21.0)  |
| <b>Marital status</b>                                           |               |         |             |         |              |         |
| Unmarried                                                       | 15            | (39.5)  | 14          | (32.6)  | 29           | (35.8)  |
| Married                                                         | 23            | (60.5)  | 29          | (67.4)  | 52           | (64.2)  |
| <b>Alcohol use</b>                                              |               |         |             |         |              |         |
| Current user                                                    | 35            | (92.1)  | 39          | (90.7)  | 74           | (91.4)  |
| No. days drank in the previous month, median (IQR)              | 10            | (5–10)  | 15          | (15–20) | 15           | (15–20) |
| No. of drinks drank per day in the previous month, median (IQR) | 1             | (1–1)   | 2           | (1–2)   | 1            | (1–2)   |

**Tobacco use**

|                                                                           |                     |                     |                     |
|---------------------------------------------------------------------------|---------------------|---------------------|---------------------|
| Current user                                                              | 22 (57.9)           | 35 (81.4)           | 57 (70.4)           |
| No. of days any tobacco products used in the previous month, median (IQR) | 7.5 (3–15)          | 25 (25–25)          | 10 (10–25)          |
| <b>Anthropometric profile</b>                                             |                     |                     |                     |
| Height (cm), median (IQR)                                                 | 152.3 (142.2–154.9) | 154.9 (152.4–158)   | 154.9 (144.8–157.5) |
| Weight (kg), median (IQR)                                                 | 44 (42–48)          | 51 (46–58)          | 47 (44–53)          |
| <b>Body mass index (kg/m<sup>2</sup>)</b>                                 |                     |                     |                     |
| Median (IQR)                                                              | 20.4 (18.3–22.2)    | 21.8 (20–23.3)      | 21.1 (19.2–22.9)    |
| Under/overweight (<18.5 or ≥25)                                           | 15 (39.5)           | 6 (14.0)            | 21 (25.9)           |
| Normal (18.5–24.9)                                                        | 23 (60.5)           | 37 (86.0)           | 60 (74.1)           |
| <b>Blood pressure (mm of Hg)</b>                                          |                     |                     |                     |
| SBP, median (IQR)                                                         | 122.5 (118.0–132.0) | 135.0 (128.0–153.0) | 130.0 (121.0–137.0) |
| DBP, median (IQR)                                                         | 75.0 (70.0–83.0)    | 86.0 (79.0–90.0)    | 83.0 (74.0–87.0)    |
| MAP, median (IQR)                                                         | 92.3 (87.0–97.0)    | 103.0 (97.0–107.7)  | 97.0 (90.3–103.7)   |

1 Abbreviations: DBP, diastolic blood pressure; IQR, interquartile range; MAP, mean arterial pressure; No., number;  
 2 SBP, systolic blood pressure.

3

4 Figure 2

5 Age-related changes in systolic (A), diastolic (B) and mean arterial (C) blood pressure in  
 6 nomadic Raute adults. Males are green dots; females are red dots. Displayed curves are third-  
 7 order polynomial fits. The shaded area represents the 95% confidence interval. The prevalence of  
 8 hypertension (D) by age group and sex. Bars represent the percentage for each category of  
 9 normotensive, prehypertensive, and hypertensive participants. The cutoffs for normotension, pre-  
 10 hypertension, and hypertension were mean SBPs of <120, 120–139, and ≥140mm of Hg  
 11 respectively, and/or mean DBPs of <80, 80–89, and ≥ 90 mm of Hg respectively. Abbreviations:  
 12 SBP, systolic blood pressure; DBP, diastolic blood pressure; MAP, mean arterial pressure.

13

#### 14 *Prevalence, associated factors, awareness, and treatment of hypertension*

15 The prevalence of hypertension was 10.5% among females, 48.8% among males, and 30.9%  
 16 overall. Males (48.8%) had a 4.6-fold higher prevalence of hypertension than females (10.5%).  
 17 Nonetheless, a significant proportion (73.7%) of females were in the pre-hypertensive group  
 18 (Figure 2, D).

19 Table 2 summarizes the participants' sociodemographic characteristics, behavioral risks, and  
 20 anthropometric profiles by hypertension status. When compared across age groups, the

1 prevalence of hypertension was 2.6 times higher among those 55 and older (52.9%) than among  
 2 those under 35 (20%). Hypertension was twice more common among those who currently drink  
 3 (32.4%) than those who do not (14.3%, data not shown). The median days the participants drank  
 4 alcohol in the previous month were higher among hypertensive than non-hypertensive  
 5 participants (15 vs. 10 days). Likewise, hypertension was 1.5 times more common among the  
 6 current tobacco user than the current non-user (30.5 vs. 20.8%). Similarly, the median days of  
 7 tobacco products used in the previous month among the hypertensive and the non-hypertensive  
 8 participants were also different (25 vs. 15 days). The median BMIs were almost similar among  
 9 participants with or without hypertension (21.5 vs. 20.5 Kg/m<sup>2</sup>).  
 10 Among the respondents who had hypertension, only 8% were aware of it. None of the  
 11 hypertensive participants ever received any treatment.

12 Table 2

13 Socio-demographic, behavioral, and anthropometric factors associated with hypertension among  
 14 the nomadic Raute population.  
 15

| Variables                                                       | Non-hypertensive (n=56) |            | Hypertensive (n=25) |             |
|-----------------------------------------------------------------|-------------------------|------------|---------------------|-------------|
|                                                                 | n                       | (n%)       | n                   | (n%)        |
| <b>Age (years)</b>                                              |                         |            |                     |             |
| Median (IQR)                                                    | 33                      | (23–42)    | 48                  | (31–61)     |
| 15–34                                                           | 32                      | (80.0)     | 8                   | (20.0)      |
| 35–54                                                           | 16                      | (66.7)     | 8                   | (33.3)      |
| ≥55                                                             | 8                       | (47.1)     | 9                   | (52.9)      |
| <b>Marital status</b>                                           |                         |            |                     |             |
| Unmarried                                                       | 20                      | (69.0)     | 9                   | (31.0)      |
| Married                                                         | 36                      | (69.2)     | 16                  | (30.8)      |
| <b>Alcohol consumption</b>                                      |                         |            |                     |             |
| Current drinker                                                 | 50                      | (67.6)     | 24                  | (32.4)      |
| No. days drank in the previous month, median (IQR)              | 10                      | (7–15)     | 15                  | (15–20)     |
| No. of drinks drank per day in the previous month, median (IQR) | 1                       | (1–1)      | 2                   | (1–3)       |
| <b>Tobacco use</b>                                              |                         |            |                     |             |
| Current user                                                    | 37                      | (64.9)     | 20                  | (35.1)      |
| Median days (IQR) any tobacco                                   | 15                      | (5.0–25.0) | 25                  | (22.5–25.0) |

products used in the previous month

| Body mass index (kg/m <sup>2</sup> ) |      |             |                  |
|--------------------------------------|------|-------------|------------------|
| Median (IQR)                         | 20.5 | (18.5–23.0) | 21.5 (19.6–22.9) |
| Under/Overweight (<18.5 Or ≥25)      | 16   | (76.2)      | 5 (23.8)         |
| Normal (18.5–24.9)                   | 40   | (66.7)      | 20 (33.3)        |

1 Abbreviations: IQR, interquartile range; No., number.

2

### 3 **Qualitative results**

4 A total of 15 Raute participants (10 males, five females, and 33.3% hypertensives) participated  
5 in IDIs, with their ages ranging from 15 to 72 years. Four non-Raute key informants (1 social  
6 scientist, two social workers, and one health worker) of diverse backgrounds working closely  
7 with the Raute community participated in the KIIs (Supplemental Table 1). None of the  
8 participants approached refused to participate. Four major themes developed from the thematic  
9 analysis are presented below, with some representative narratives from the participants with their  
10 age group, sex, hypertension status, and participant number in the parenthesis.

#### 11 ***Theme 1: Socioeconomic transition***

12 The majority of the key informants observed significant socioeconomic changes in the Raute  
13 community over the last decade. According to them, the traditional, foraging- and barter-based  
14 economy of Raute is now transitioning towards a predominantly cash-based economy. Most  
15 Raute participants, regardless of their hypertension status, agreed that their generation-old belief  
16 and view towards money is now changing.

17 [People of the previous generation did not accept paper money. They exchanged their wooden wares  
18 for grains, flour, and other essentials. They thought accepting paper money was a sin and brought bad  
19 luck during their hunting. These days, even our chieftains prefer paper money so that they can  
20 purchase goods whenever needed and do not have to carry heavy loads of goods while migrating.]  
21 (Raute male, age range 40–45 years, non-hypertensive, IDI#11)

1 Currently, from the federal and provincial governments combined, each individual, including  
2 children from the Raute community, receives a sum of 5,000 Nepali Rupees (Approx. 42 USD)  
3 per month.[30] The allowance provided by the government was noted by most participants as the  
4 main driver of the socio-economic transition of the community.

5 [In the past, we used to earn our living with the use of our muscles. These days we get an allowance.  
6 These days we have ease.] (Raute male, age range 55–60 years, hypertensive, IDI#14)

7 [Previously, my parents must have had so much hardship raising me. We did not have an allowance.  
8 They used to make wooden bowls and boxes, go to the village, and exchange them for grains. They ate  
9 a little and gave it to me. That's how they raised me. Nowadays, it is much better.] (Raute male, age  
10 range 30-35 years, non-hypertensive, IDI#8)

11 One of our KII participants indicated that the Rautes' proximity to settled communities has  
12 increased. They now prefer to camp close to market areas where commodities may be easily  
13 obtained. Even the Rautes have perceived less of a need to work as the allowance money they  
14 receive can be used to purchase food and other essentials.

15 [We don't work as much as before. We can purchase our grains and essentials with an allowance. We  
16 go to the forest only for firewood and wood for making our hut. We don't carry big logs to make  
17 wooden wares as much as before.] (Raute male, age range 55–60, hypertensive, IDI#14)

18 Most of the participants of IDI had witnessed a significant decline in the demand and, therefore,  
19 the production of traditional wooden wares. Even though most males identified 'crafting and  
20 trading' as their primary occupation in our quantitative study, many stated that they now craft  
21 wooden wares just to keep the tradition alive. A few participants noted that the change in the  
22 livelihood of the Raute was inevitable as modern industrial wares became popular.

23 [People don't like using traditional wooden wares anymore. They prefer to use steel and other  
24 metalware these days.] (Raute female, age range 50–55 years, non-hypertensive, IDI#12)

## 1 *Theme 2: Change in patterns of alcohol and tobacco use*

### 2 *2.1 Alcohol consumption*

3 Although drinking homemade alcohol has long been a Raute tradition, most participants have  
4 noted a shift in alcohol consumption in recent years. Raute, who used to drink traditionally made  
5 alcohol occasionally, has lately begun purchasing commercial alcohol from surrounding  
6 communities and marketplaces. Many IDIs and KIIs have speculated that their increasing  
7 interaction with outsiders could be one of the factors contributing to the Raute community's  
8 rising alcohol usage.

9 [We have been drinking homemade alcohol made in wooden vessels since the time of our forefathers.  
10 However, the local liquor made and sold by the settled communities and bottled alcohol is getting  
11 increasingly popular in recent years. Rautes learned it from the outsiders.] (Raute male, age range 55–  
12 60 years, hypertensive, current drinker, IDI#14)

13 All the participants of KII reported widespread use of alcohol among Rautes, including youths  
14 and children. As evident in our quantitative study, an alarmingly high proportion of Raute youth  
15 currently consumes alcohol and tobacco products. One adolescent participant stated that drinking  
16 alcohol is common among young Rautes, including children, and they learn it from their elders.

17 [These days, big people, even our chieftains, everyone drinks alcohol. So, we, too, drink alcohol. Even  
18 small children, smaller than me, consume alcohol. Rautes are like this.] (Raute male, age range 15–20)  
19 years, non-hypertensive, current drinker, IDI#1)

20 One of our KII participants speculated that the provisions of allowance by the government could  
21 have an important influence on the recent change in alcohol consumption among the Raute  
22 community.



1 [Ever since the government started providing them with an allowance, they seem confused about  
2 investing this money. They started spending money on alcohol and tobacco.] (Social Scientist, male,  
3 age range 50–55 years, KII#3)

4 However, some Rautes claimed that only a negligible portion of the allowance is spent on buying  
5 alcohol.

6 [We don't spend too much money on alcohol. We first buy rice, salt, and flour. We buy alcohol from  
7 what remains.] (Raute male, age range 30–35 years, hypertensive, current drinker, IDI#9)

8 Most of the IDI participants could not clearly outline the adverse health effects of alcohol  
9 regardless of their hypertension status. Some participants had certain ideas about the influence of  
10 alcohol on their socioeconomic life, general health, and injuries, e.g., falls and burns.

11 [We don't go hunting these days as much as we used to. People nowadays drink alcohol from the  
12 allowance they receive. They can't go hunting when they are drunk. Alcohol makes them feel weak.]  
13 (Raute male, age range 15–20 years, non-hypertensive, current drinker, IDI#1)

14 [I have heard that alcohol affects our chest and intestine.] (Raute male, age range 15–20 years,  
15 hypertensive, current drinker, IDI#3)

16 [Both I and my wife drink alcohol. Once, we drank and slept near the fireplace. I woke up with a burnt  
17 face the next morning. I was so drunk that I did not realize it.] (Raute male, age range 30–35 years,  
18 hypertensive, current drinker, IDI#9)

19 According to a health worker (KII) who works closely with the Raute community, the usage of  
20 commercial alcohol has adversely affected the health of Raute youths.

21 [Commercial, low-quality alcohol has adversely affected the health of the youth of this community. I  
22 saw some young people with jaundice. It must have been caused by alcohol; don't you think so?]  
23 (Health worker, male, age range 25–30 years, KII#1)

## 1 *2.2 Tobacco Use*

2 Most of the Rautes reported using tobacco—the preference for the type of tobacco varied  
3 between men and women. We did not find significant differences in patterns, preferences, and  
4 perceptions regarding tobacco use among hypertensive and non-hypertensive participants.

5 [We, men, prefer chewing tobacco while women prefer cigarettes, hookah, and other smoking  
6 tobacco.] (Raute male, age range 55–60 years, hypertensive, current tobacco user, IDI#14)

7 A recent shift in the pattern with increased use of commercially available tobacco products has  
8 been reported by the Rautes.

9 [Women used to take hookah in the past. They used to make their own tobacco from tobacco leaves.  
10 Nowadays, they can easily buy cigarettes from the marketplace and smoke.] (Raute male, age range  
11 25–30 years, non-hypertensive, IDI#7)

12 During our IDI, a few Raute asked us for chewing-tobacco. Some participants demanded tobacco  
13 products as incentives for participating in our interviews.

14 [Raute cannot speak without tobacco. We will talk to you only if you give us tobacco.] (Raute male,  
15 25–30 years, non-hypertensive, current tobacco user, IDI#6)

16 Most of the respondents were not aware of the adverse effects of tobacco. Only a few  
17 participants were able to state that smoking negatively affects health, but they were unable to  
18 outline the direct health effects of smoking.

19 [Smoking blackens our lungs.] (Raute male, age range 15–20 years, hypertensive, current tobacco  
20 user, IDI#3)

1 ***Theme 3: Changing diet and food security***

2 Most Raute participants had witnessed a significant change in their dietary patterns in recent  
3 years. The majority also noted a substantial improvement in food security in recent years  
4 compared to the past.

5 [In the past, if we could sell our woodenware, we got to eat food; else, we had to either sleep on an  
6 empty stomach or borrow food from relatives. These days, we don't need to sleep hungry.] (Raute  
7 male, age range 55–60 years, non-hypertensive, IDI#14)

8 Historically, the Raute diet consisted of grains obtained through barter and roots, tubers, and  
9 herbs collected from the forest, supplemented with bushmeat, according to most participants.  
10 The current Raute diet consists chiefly of rice grain and a few vegetables obtained directly from  
11 the market or donated by various governmental and non-governmental organizations.  
12 Participants reported that hunted game, wild roots, and tubers are less common in their current  
13 diet than in the past. The participants did not differ in their perception of changing dietary  
14 patterns based on their hypertension status.

15 [We previously used to bring air potato, yam, and five-leaf yam from the jungle and eat them. These  
16 days, we eat rice all the time.] (Raute male, age range 30–35 years, hypertensive, IDI#9)

17 Many Raute participants reported that they used to self-process and prepare their food from raw  
18 grains. Packaged and processed modern foods have been reported to find their way into the  
19 Raute diet in recent years.

20 [Back then, we used to go to a watermill or grind it in a large mortar to make flour out of millet and  
21 maize to make flatbread. We used to eat roasted maize. Nowadays, we can easily buy Rice and  
22 processed wheat flour from the marketplace.] (Raute female, age range 30–35 years, non-hypertensive,  
23 IDI#10)

1 [In our times, we used to eat bayberries, barberries, guava, and various other wild fruits. Young people  
2 these days have learned to eat noodles and biscuits.] (Raute male, age range 55–60 years,  
3 hypertensive, IDI#14)

#### 4 ***Theme 4: Traditional healthcare practices***

5 In their ill health, the majority of participants of IDIs reported using various kinds of medicinal  
6 herbs based on their indigenous knowledge and seeking traditional healers within their  
7 community who practice spiritual healing and herbal medicine. A few participants also stated  
8 that they should visit healthcare workers if the illness does not improve with traditional healing,  
9 indicating growing awareness of modern healthcare.

10 [If we get sick, we try home remedies such as medicinal herbs from the jungle. We also go to the  
11 traditional healer to blow charms and assess pulse. If we don't get better, nowadays they (Outsiders)  
12 say we should go to the doctor.] (Raute male, age range 55–60 years, hypertensive, IDI#14)

13

## 1 **Discussion**

2 To the best of our knowledge, this is the first study to assess the status of cardiometabolic health  
3 and investigate hypertension as an emerging health concern among endangered Raute hunter-  
4 gatherers of Nepal. Overall, 30.9% of the population (10.5% of females and 48.8% of males)  
5 were found to have hypertension. A significant majority currently consumes alcohol (91.4%) and  
6 tobacco (70.4%), with an alarmingly high prevalence among youths (68 and 42%, respectively).  
7 Our qualitative analysis showed that the traditional forage- and barter-based Raute economy had  
8 been gradually transitioning into a cash-based economy that is heavily reliant on state incentives,  
9 leading to a decline in forest-based activities and an increase in the consumption of purchased  
10 foods, beverages, and tobacco products with the increased market involvement.

11 Although there is still a great paucity of research on HG health, extant data show that HGs and  
12 other small-scale subsistence-based populations have a significantly lower prevalence of  
13 lifestyle-related diseases, including hypertension.[7,31] HGs with relatively traditional living,  
14 such as the Pygmies of Southern Cameroon and the Hadza of Northern Tanzania, for example,  
15 were found to have remarkably lower rates of hypertension (3.3 and 13%, respectively).[31–33]  
16 Similarly, the Tsimane forager-horticulturists of the Bolivian Amazon also showed a low  
17 prevalence of hypertension (2.9%) and no significant increase in BP with age.[34] In contrast to  
18 these studies, we found a much higher (30.9%) prevalence of hypertension among nomadic  
19 Raute HGs exceeding that of general Nepalese populations (Rural: 19.1–23.8, Urban: 22.4–  
20 25.2%) based on data from the most recent composite national surveys.[18,35] Metanalyses have  
21 reported slightly higher national pooled prevalence ranging from 27.3% to up to 32%.[36,37] A  
22 recent survey that included samples from former nomadic HGs, including sedentary Rautes from  
23 the far west, reported a relatively lower prevalence (23.8%) of hypertension among the

1 indigenous Nepalese population.[38] Among Negritos, Batek, and Jehai HGs from Peninsular  
2 Malaysia who receive significant government support and have stable livelihoods demonstrated a  
3 much higher (>40%) prevalence of hypertension than our study population.[39,40] The  
4 differences in hypertension prevalence observed across these populations might be due to various  
5 variables. Aside from genetic, ethnic, and environmental variations, lifestyle, diet, level of  
6 physical activity, behavioral risks, and degree of acculturation should all be considered.

7 The effect of gender and age on BP is well established.[41,42] In the general population, both  
8 SBP and DBP rise steadily in early adulthood up to age 50 years, following which SBP steeply  
9 rises while DBP markedly declines.[42] In our study, SBP increased steadily with age, whereas  
10 DBP did not demonstrate a significant rise. In contrast, Tsimane and Hadza HGs exhibited a less  
11 sustained change in BP with the age profiles.[31,43] Across all age categories in our study,  
12 males had considerably higher SBP and DBP than females, albeit the difference in BP narrowed  
13 slightly after the age of 60 years. This is in agreement with the findings among the general  
14 population.[41,44] The BP amplification from central to peripheral arteries increases with body  
15 height and is thus more pronounced in males.[45] This may partly explain why brachial artery  
16 BP is lower among premenopausal females than among age-matched males. Nonetheless, the  
17 origin of sexual dimorphism in BP might be multifaceted, encompassing the combined influence  
18 of hormonal, chromosomal, genetic, and morphological variations in body size and  
19 socioeconomic and environmental covariates.[46–48] Surprisingly, recent sex-specific analyses  
20 indicated that females, compared to males, exhibit a steeper rise in BP with age starting early in  
21 life.[46] Among subsistent populations, Tsimane and Pygmy females demonstrated similar  
22 gender-related variations in BP.[31,32] Hadza, on the other hand, exhibited only age-related, not  
23 gender-related, changes in BP.[33] In our study, the proportion of males with hypertension was

1 significantly higher than that of females. Findings from Tsimane and Pygmies resonate with  
2 this.[31,32] In contrast, Hadza females had a higher prevalence of hypertension compared to  
3 males.[33]

4 A significant majority of the participants in our study were current drinkers (91.4%) and some  
5 forms of current tobacco users (70.4%). This exceeds the rate of current alcohol (20.8%) and  
6 tobacco (28.9%) use among the general Nepalese population.[18] High rates of alcohol (68%)  
7 and tobacco (42%) use among the young Raute population under 25 were particularly  
8 concerning. Raute youths claim to have learned it from their elders. However, Raute elders  
9 believe that their increased interaction with the '*Duniya*' (the outside world) has influenced the  
10 new generation's heavy use of commercial alcohol and tobacco products. Among Rautes,  
11 hypertension was more than twice as common among individuals who currently drink or use  
12 tobacco products than those who do not. Interestingly, conventional risk factors, such as alcohol  
13 and tobacco use, were not found to be strongly associated with hypertension in many traditional  
14 populations, despite their high prevalence.[31,32,38,49,50] This might imply that these  
15 populations could have other important hypertension risk factors not caught by existing survey  
16 instruments or that they have several protective factors that negate the risk associated with these  
17 conventional risk factors, emphasizing the importance of a context-specific approach.

18 Globally, HGs communities are renowned for their remarkably low obesity.[7] Only a small  
19 minority (8.6%) of our study population was overweight (BMI 25–29.9 kg/m<sup>2</sup>), and we found no  
20 obesity (BMI ≥30 kg/m<sup>2</sup>). Among the well-studied HG populations, the prevalence of  
21 overweight ranged from 2% among the Hazda to 15–21% among the Tsimane.[7,51] BMI  
22 positively correlates with BP among Tsimane and Pygmies.[31,32,52] However, we did not find  
23 a correlation between BMI and BP among our study population.

1 In meta-analyses of several RCTs, the paleolithic diets based on lean meat, fish, fruits,  
2 vegetables, root vegetables, eggs, and nuts were shown to have more significant improvements in  
3 cardiometabolic parameters such as BP, BMI, lipid profile, and blood sugar level than the  
4 guideline-based control diets. However, the benefits were transient, and the strength of the  
5 evidence was low.[53,13,54] A transition from the traditional HG diet to a grain-based western  
6 diet has been reported to result in a deterioration in general health and an increase in obesity,  
7 diabetes, and other metabolic diseases among Australian HGs.[14,55] Interestingly, temporary  
8 reversal to the traditional diet among Australian aborigines was further shown to result in marked  
9 improvement in carbohydrate and lipid metabolism.[56] Although we did not collect exclusive  
10 quantitative data on the Raute diet and nutrition, our qualitative data showed a transition from a  
11 traditional forest-based nomadic diet to a grain-based diet with an increasing proportion of  
12 market-bought, packaged/processed foods and beverages gradually getting their way into the  
13 Raute food culture in recent years. The factors we found, which are also supported by the  
14 previous studies, such as depleting forest resources, shrinking traditional barter system, stable  
15 cash flow in the form of state incentives, and increasing market involvement, may all be  
16 implicated in such dietary transition.[57,58] There is evidence that monetary income and access  
17 to the market contributed to a greater intake of energy-dense foods like sugar and oil, as well as a  
18 higher rate of obesity and increased drinking and smoking among HGs.[59] Nonetheless, the  
19 interaction between market, diet, and HG's health is complex and warrants more research.

20 Socioeconomic transition, acculturation, and exposure to Western lifestyles have been equated to  
21 an increase in the prevalence of so-called "diseases of civilization" including hypertension,  
22 among many traditional communities worldwide.[11,12,60–63] Socioeconomic transition, a  
23 major theme of our qualitative analysis, was frequently linked to rising commercial alcohol and



1 tobacco use and changing dietary patterns among Raute. A high rate of alcohol consumption,  
2 particularly hazardous consumption, and declining foraging behavior with the socio-economic  
3 transition has been well documented among the Congolese BaYaka and Tanzanian Hadza HGs,  
4 respectively, which resonate with our findings.[64,65]

5 The Rautes have rich indigenous knowledge of medicinal herbs. Although traditional healing is  
6 still practiced, the Raute is increasingly becoming more aware of modern healthcare. The  
7 awareness of the diagnosis among hypertensive participants was 8%, which should not be  
8 surprising given the low awareness (~22%) even among the general population, reflecting  
9 overall poor access to and under-utilization of healthcare services in Nepal.

10 Our study identifies a high burden of hypertension among nomadic Raute HGs in the background  
11 of changing socioeconomic status, dietary patterns, and health behaviors. The long-term impact  
12 of these changes on Rautes' health is yet to be explored. From the studies conducted in Australia  
13 and South America, it is evident that incidences of cardiovascular and metabolic diseases  
14 increase when the population moves away from their traditional lifestyles and gets exposed to  
15 modernization.[11,12] The association of various socioeconomic, dietary, and lifestyle factors in  
16 populations as simple as HGs emphasizes their potential contribution to the occurrence of  
17 cardiovascular disorders like hypertension in other indigenous and general populations in Nepal  
18 and elsewhere.

## 19 **Study limitation**

20 The several limitations of this study should be noted. The cross-sectional nature of the study  
21 limits its ability to establish or refute causal relationships between the variables studied and  
22 hypertension. The prevalence of hypertension estimated in this study should be interpreted with

1 caution. The prevalence of hypertension tends to be overestimated in cross-sectional analyses,  
2 highlighting the significance of longitudinal monitoring for accurate estimation.[31] We did not  
3 collect data on several important factors such as dietary fruits and vegetable consumption, salt  
4 intake, level of physical activities, and presence of diabetes mellitus, hyperlipidemia, or central  
5 adiposity among our study participants, which would have given deeper insight into the actual  
6 CVD risk of this population. Our study was primarily deficit-focused; however, a strengths-  
7 based approach highlighting the community's resilience and strengths alongside its deficiencies  
8 would have been more insightful and empowering. We recommend that future research take this  
9 critical aspect into account.

10 Despite these limitations, this study has several strengths. This study is the first to report the  
11 prevalence of hypertension and some of its important socio-demographic, behavioral, and  
12 metabolic covariates in this unique, difficult-to-reach, endangered population. Enrollment of the  
13 entire population, rigorous data collection protocol, and utilization of a mixed-method study to  
14 get both quantitative and qualitative perspectives were the strengths of this study.

## 15 **Conclusion**

16 We found a high burden of hypertension among nomadic Raute HGs exceeding that of the  
17 general Nepalese population. Alcohol and tobacco use was widespread, with alarmingly high  
18 rates among youths. The traditional forest-based Raute economy is gradually transitioning to a  
19 cash-based economy heavily reliant on government incentives. Consumption of purchased foods,  
20 beverages, and tobacco products is increasing in tandem with market involvement. Nonetheless,  
21 further research is needed to assess the long-term health impact of these socioeconomic, dietary,  
22 and behavioral changes. This study is expected to help appraise concerned policymakers of an  
23 emerging health concern and formulate effective context-specific and culturally sensitive

1 community-based interventions to limit the morbidities and mortality associated with  
2 hypertension in the endangered nomadic Raute population.

### 3 **Data availability statement**

4 All data relevant to the study are included in the article or uploaded as supplementary  
5 information. The original datasets are available from the Figshare Digital Repository,  
6 <https://doi.org/10.6084/m9.figshare.20358837.v2>. [66]

### 7 **Ethics statements**

#### 8 **Patient consent for publication**

9 Not required.

#### 10 **Ethical approval**

11 The ethical clearance for this study was obtained from Nepal Health Research Council, Ethical  
12 Review Board (Reference No. 2972, Protocol Reg. No. 199/2021P). Informed written  
13 consent/assent was obtained from each respondent before the structured questionnaire was  
14 administered. Verbal consent was obtained before each IDI and KII and was audio recorded.  
15 Participants were informed about the voluntary nature of the study, the maintenance of  
16 confidentiality, and the right to refuse or withdraw at any time during the study. No financial  
17 incentive was given to the participants of this study.

#### 18 **Acknowledgment**

19 We are grateful to all our study participants, Raute chieftain Mr. Surya Narayan Shahi and  
20 former chieftain Mr. Mahin Bahadur Shahi, for their kind cooperation. We express our sincere  
21 gratitude for the facilitation provided by Mr. Binod Kumar BC, field coordinator, Ms. Satya Devi

1 Adhikari, social worker, and the Public Health Service Office, Surkhet. We thank all the data  
2 enumerators, and Mr. Ram Prasad Bhandari, for assistance during data collection and processing.  
3 We thank Mr. Shital Bhandary (Associate Professor, Patan Academy of Health Sciences, Nepal)  
4 for assisting us with statistical analysis. We also acknowledge the language editing and  
5 proofreading assistance provided by Dr. Bibiana Cujec (Professor, Faculty of Medicine and  
6 Dentistry, University of Alberta, Canada) and Dr. Richard Philip McGuire (Bella Coola General  
7 Hospital, British Columbia, Canada).

## 8 **References**

- 9 1 The Editors of Encyclopaedia Britannica. Nomadism. Britannica.  
10 <https://www.britannica.com/topic/nomadism> (accessed 27 Jun 2021).
- 11 2 Lee RB, DeVore I. *Man the Hunter: The First Intensive Survey of a Single, Crucial Stage of*  
12 *Human Development— Man’s Once Universal Hunting Way of Life*. 1st ed. Routledge 2017.  
13 doi:10.4324/9780203786567
- 14 3 Asner GP, Knapp DE, Broadbent EN, *et al*. Selective Logging in the Brazilian Amazon.  
15 *Science* 2005;**310**:480–2. doi:10.1126/science.1118051
- 16 4 Tallavaara M, Seppä H. Did the mid-Holocene environmental changes cause the boom and  
17 bust of hunter-gatherer population size in eastern Fennoscandia? *The Holocene*  
18 2012;**22**:215–25. doi:10.1177/0959683611414937
- 19 5 Armit I, Finlayson B. Hunter-gatherers transformed: the transition to agriculture in northern  
20 and western Europe. *Antiquity* 1992;**66**:664–76. doi:10.1017/S0003598X00039363
- 21 6 Kramer KL, Coddling BF. *Why forage? hunters and gatherers in the twenty-first century*.  
22 Albuquerque: : University of New Mexico press 2016.
- 23 7 Pontzer H, Wood BM, Raichlen DA. Hunter-gatherers as models in public health. *Obes Rev*  
24 *Off J Int Assoc Study Obes* 2018;**19 Suppl 1**:24–35. doi:10.1111/obr.12785
- 25 8 Gurven MD, Trumble BC, Stieglitz J, *et al*. Cardiovascular disease and type 2 diabetes in  
26 evolutionary perspective: A critical role for helminths? *Evol Med Public Health*  
27 2016;**2016**:338–57. doi:10.1093/emph/eow028
- 28 9 Eaton SB, Konner M, Shostak M. Stone agers in the fast lane: Chronic degenerative diseases  
29 in evolutionary perspective. *Am J Med* 1988;**84**:739–49. doi:10.1016/0002-9343(88)90113-1

- 1 10 Lindeberg S. *Food and western disease: health and nutrition from an evolutionary*  
2 *perspective*. Chichester, U.K.; Ames, Iowa: : Wiley-Blackwell 2010.
- 3 11 O’Dea K. Westernisation, insulin resistance and diabetes in Australian Aborigines. *Med J*  
4 *Aust* 1991;**155**:258–64. doi:10.5694/j.1326-5377.1991.tb142236.x
- 5 12 Steffen PR, Smith TB, Larson M, *et al*. Acculturation to Western society as a risk factor for  
6 high blood pressure: a meta-analytic review. *Psychosom Med* 2006;**68**:386–97.  
7 doi:10.1097/01.psy.0000221255.48190.32
- 8 13 Ghaedi E, Mohammadi M, Mohammadi H, *et al*. Effects of a Paleolithic Diet on  
9 Cardiovascular Disease Risk Factors: A Systematic Review and Meta-Analysis of  
10 Randomized Controlled Trials. *Adv Nutr* 2019;**10**:634–46. doi:10.1093/advances/nmz007
- 11 14 O’Keefe JH, Cordain L. Cardiovascular Disease Resulting From a Diet and Lifestyle at Odds  
12 With Our Paleolithic Genome: How to Become a 21st-Century Hunter-Gatherer. *Mayo Clin*  
13 *Proc* 2004;**79**:101–8. doi:10.4065/79.1.101
- 14 15 Cordain L, Miller JB, Eaton SB, *et al*. Plant-animal subsistence ratios and macronutrient  
15 energy estimations in worldwide hunter-gatherer diets. *Am J Clin Nutr* 2000;**71**:682–92.  
16 doi:10.1093/ajcn/71.3.682
- 17 16 Reinhard J. The Raute: Notes on a Nomadic Hunting and Gathering Tribe of Nepal. *Kailash*  
18 *- Journal of Himalayan Studies* 1974;**2**:233–72. doi:10/227326
- 19 17 Zhou B, Carrillo-Larco RM, Danaei G, *et al*. Worldwide trends in hypertension prevalence  
20 and progress in treatment and control from 1990 to 2019: a pooled analysis of 1201  
21 population-representative studies with 104 million participants. *The Lancet* 2021;**398**:957–  
22 80. doi:10.1016/S0140-6736(21)01330-1
- 23 18 Dhimel M BB Bhattarai S, Dixit LP, Hyder MKA, Agrawal N, Rani M, Jha AK. *Report on*  
24 *Noncommunicable Risk Factors: STEPS Survey Nepal 2019*. Kathmandu: : Nepal Health  
25 Research Council 2020. [https://www.who.int/docs/default-source/nepal-](https://www.who.int/docs/default-source/nepal-documents/ncds/ncd-steps-survey-2019-compressed.pdf?sfvrsn=807bc4c6)  
26 [documents/ncds/ncd-steps-survey-2019-compressed.pdf?sfvrsn=807bc4c6](https://www.who.int/docs/default-source/nepal-documents/ncds/ncd-steps-survey-2019-compressed.pdf?sfvrsn=807bc4c6)
- 27 19 Mesenburg MA, Restrepo-Mendez MC, Amigo H, *et al*. Ethnic group inequalities in  
28 coverage with reproductive, maternal and child health interventions: cross-sectional analyses  
29 of national surveys in 16 Latin American and Caribbean countries. *Lancet Glob Health*  
30 2018;**6**:e902–13. doi:10.1016/S2214-109X(18)30300-0
- 31 20 Adams MW, Sutherland EG, Eckert EL, *et al*. Leaving no one behind: targeting mobile and  
32 migrant populations with health interventions for disease elimination—a descriptive  
33 systematic review. *BMC Med* 2022;**20**:172. doi:10.1186/s12916-022-02365-6
- 34 21 Fortier J. The Ethnography of South Asian Foragers. *Annu Rev Anthropol* 2009;**38**:99–114.  
35 doi:10.1146/annurev-anthro-091908-164345

- 1 22 Shahu MB. Reciprocity practices of nomadic hunter-gatherer Rāute of Nepal. *Hunt Gatherer*  
2 *Res* 2018;**4**:257–86.
- 3 23 Fortier J. Monkey’s Thigh Is the Shaman’s Meat. In: *Kings of the Forest*. University of  
4 Hawai’i Press 2009. doi:10.21313/hawaii/9780824833220.003.0005
- 5 24 Fortier J. *Kings of the forest: the cultural resilience of Himalayan hunter-gatherers*.  
6 Honolulu: : University of Hawai’i Press 2009.
- 7 25 Acharya KP, Paudel PK. *Biodiversity in Karnali Province: Current Status and Conservation*.  
8 Ministry of Industry, Tourism, Forest and Environment, Karnali Province Government,  
9 Surkhet, Nepal 2020. [http://moitfe.karnali.gov.np/sites/moitfe/files/2020-](http://moitfe.karnali.gov.np/sites/moitfe/files/2020-12/Karnali%20Province%202020_13%20oct%202020_0.pdf)  
10 [12/Karnali%20Province%202020\\_13%20oct%202020\\_0.pdf](http://moitfe.karnali.gov.np/sites/moitfe/files/2020-12/Karnali%20Province%202020_13%20oct%202020_0.pdf)
- 11 26 Cashin K, Oot L. *Guide to Anthropometry: A Practical Tool for Program Planners,*  
12 *Managers, and Implementers*. Washington, DC: : Food and Nutrition Technical Assistance  
13 III Project (FANTA)/ FHI 360 2018.
- 14 27 Central Bureau of Statistics (CBS). *Nepal Multiple Indicator Cluster Survey 2019, Survey*  
15 *Findings Report*. Kathmandu, Nepal: : Central Bureau of Statistics and UNICEF Nepal 2020.  
16 <https://www.unicef.org/nepal/reports/multiple-indicator-cluster-survey-final-report-2019>
- 17 28 Ministry of Health and Population (MOHP) [Nepal] NE ICF International Inc. *Nepal*  
18 *Demographic and Health Survey 2016*. Kathmandu, Nepal: : Ministry of Health and  
19 Population, New ERA, and ICF International, Calverton, Maryland 2017.  
20 <https://www.dhsprogram.com/pubs/pdf/fr336/fr336.pdf>
- 21 29 Chobanian AV. The Seventh Report of the Joint National Committee on Prevention,  
22 Detection, Evaluation, and Treatment of High Blood PressureThe JNC 7 Report. *JAMA*  
23 2003;**289**:2560. doi:10.1001/jama.289.19.2560
- 24 30 myRepública. Karnali government to set up ‘Raute Protection Fund’. *myRepública*  
25 2020.[https://myrepublica.nagariknetwork.com/news/karnali-government-to-set-up-raute-](https://myrepublica.nagariknetwork.com/news/karnali-government-to-set-up-raute-protection-fund/)  
26 [protection-fund/](https://myrepublica.nagariknetwork.com/news/karnali-government-to-set-up-raute-protection-fund/)
- 27 31 Gurven M, Blackwell AD, Rodríguez DE, *et al*. Does blood pressure inevitably rise with  
28 age?: longitudinal evidence among forager-horticulturalists. *Hypertens Dallas Tex* 1979  
29 2012;**60**:25–33. doi:10.1161/HYPERTENSIONAHA.111.189100
- 30 32 Bika Lele EC, Hermans MP, Bovet P, *et al*. Prevalence and determinants of blood pressure  
31 variability in pygmies of Southern region Cameroon. *J Hypertens* 2020;**38**:2198–204.  
32 doi:10.1097/HJH.0000000000002529
- 33 33 Raichlen DA, Pontzer H, Harris JA, *et al*. Physical activity patterns and biomarkers of  
34 cardiovascular disease risk in hunter-gatherers. *Am J Hum Biol* 2017;**29**:e22919.  
35 doi:10.1002/ajhb.22919

- 1 34 Kaplan H, Thompson RC, Trumble BC, *et al.* Coronary atherosclerosis in indigenous South  
2 American Tsimane: a cross-sectional cohort study. *The Lancet* 2017;**389**:1730–9.  
3 doi:10.1016/S0140-6736(17)30752-3
- 4 35 Das Gupta R, Bin Zaman S, Wagle K, *et al.* Factors associated with hypertension among  
5 adults in Nepal as per the Joint National Committee 7 and 2017 American College of  
6 Cardiology/American Heart Association hypertension guidelines: a cross-sectional analysis  
7 of the demographic and health survey 2016. *BMJ Open* 2019;**9**:e030206.  
8 doi:10.1136/bmjopen-2019-030206
- 9 36 Huang Y, Guo P, Karmacharya BM, *et al.* Prevalence of hypertension and prehypertension in  
10 Nepal: a systematic review and meta-analysis. *Glob Health Res Policy* 2019;**4**:11.  
11 doi:10.1186/s41256-019-0102-6
- 12 37 Dhungana RR, Pandey AR, Shrestha N. Trends in the Prevalence, Awareness, Treatment,  
13 and Control of Hypertension in Nepal between 2000 and 2025: A Systematic Review and  
14 Meta-Analysis. *Int J Hypertens* 2021;**2021**:e6610649. doi:10.1155/2021/6610649
- 15 38 Deneke TW, Gautam Y, Bhandari D, *et al.* Prevalence and determinants of hypertension in  
16 underrepresented indigenous populations of Nepal. *PLOS Glob Public Health*  
17 2022;**2**:e0000133. doi:10.1371/journal.pgph.0000133
- 18 39 Mokhsin A, Mokhtar SS, Mohd Ismail A, *et al.* Observational study of the status of coronary  
19 risk biomarkers among Negritos with metabolic syndrome in the east coast of Malaysia. *BMJ*  
20 *Open* 2018;**8**:e021580. doi:10.1136/bmjopen-2018-021580
- 21 40 Phipps ME, Chan KK, Naidu R, *et al.* Cardio-metabolic health risks in indigenous  
22 populations of Southeast Asia and the influence of urbanization. *BMC Public Health*  
23 2015;**15**:47. doi:10.1186/s12889-015-1384-3
- 24 41 Franklin SS, Gustin W, Wong ND, *et al.* Hemodynamic Patterns of Age-Related Changes in  
25 Blood Pressure: The Framingham Heart Study. *Circulation* 1997;**96**:308–15.  
26 doi:10.1161/01.CIR.96.1.308
- 27 42 Cheng S, Xanthakis V, Sullivan LM, *et al.* Blood Pressure Tracking Over the Adult Life  
28 Course: Patterns and Correlates in the Framingham Heart Study. *Hypertension*  
29 2012;**60**:1393–9. doi:10.1161/HYPERTENSIONAHA.112.201780
- 30 43 Barnicot NA, Bennett FJ, Woodburn JC, *et al.* Blood pressure and serum cholesterol in the  
31 Hadza of Tanzania. *Hum Biol* 1972;**44**:87–116.
- 32 44 Pearson JD, Morrell CH, Brant LJ, *et al.* Age-Associated Changes in Blood Pressure in a  
33 Longitudinal Study of Healthy Men and Women. *J Gerontol A Biol Sci Med Sci*  
34 1997;**52A**:M177–83. doi:10.1093/gerona/52A.3.M177
- 35 45 London GM, Guerin AP, Pannier B, *et al.* Influence of Sex on Arterial Hemodynamics and  
36 Blood Pressure: Role of Body Height. *Hypertension* 1995;**26**:514–9.  
37 doi:10.1161/01.HYP.26.3.514



- 1 46 Ji H, Kim A, Ebinger JE, *et al.* Sex Differences in Blood Pressure Trajectories Over the Life  
2 Course. *JAMA Cardiol* 2020;**5**:255. doi:10.1001/jamacardio.2019.5306
- 3 47 Arnold AP, Cassis LA, Eghbali M, *et al.* Sex Hormones and Sex Chromosomes Cause Sex  
4 Differences in the Development of Cardiovascular Diseases. *Arterioscler Thromb Vasc Biol*  
5 2017;**37**:746–56. doi:10.1161/ATVBAHA.116.307301
- 6 48 Dickerson JA, Nagaraja HN, Raman SV. Gender-Related Differences in Coronary Artery  
7 Dimensions: A Volumetric Analysis. *Clin Cardiol* 2010;**33**:E44–9. doi:10.1002/clc.20509
- 8 49 Manimunda SP, Sugunan AP, Benegal V, *et al.* Association of hypertension with risk factors  
9 & hypertension related behaviour among the aboriginal Nicobarese tribe living in Car  
10 Nicobar Island, India. *Indian J Med Res* 2011;**133**:287–93.
- 11 50 Pavan L, Casiglia E, Braga LM, *et al.* Effects of a traditional lifestyle on the cardiovascular  
12 risk profile: the Amondava population of the Brazilian Amazon. Comparison with matched  
13 African, Italian and Polish populations. *J Hypertens* 1999;**17**:749–56.  
14 doi:10.1097/00004872-199917060-00005
- 15 51 Gurven M, Jaeggi AV, Kaplan H, *et al.* Physical activity and modernization among Bolivian  
16 Amerindians. *PloS One* 2013;**8**:e55679. doi:10.1371/journal.pone.0055679
- 17 52 Gurven M, Kaplan H, Winking J, *et al.* Inflammation and Infection Do Not Promote Arterial  
18 Aging and Cardiovascular Disease Risk Factors among Lean Horticulturalists. *PLoS ONE*  
19 2009;**4**:e6590. doi:10.1371/journal.pone.0006590
- 20 53 Manheimer EW, van Zuuren EJ, Fedorowicz Z, *et al.* Paleolithic nutrition for metabolic  
21 syndrome: systematic review and meta-analysis. *Am J Clin Nutr* 2015;**102**:922–32.  
22 doi:10.3945/ajcn.115.113613
- 23 54 Dinu M, Pagliai G, Angelino D, *et al.* Effects of Popular Diets on Anthropometric and  
24 Cardiometabolic Parameters: An Umbrella Review of Meta-Analyses of Randomized  
25 Controlled Trials. *Adv Nutr* 2020;**11**:815–33. doi:10.1093/advances/nmaa006
- 26 55 O’Dea K, Spargo RM, Akerman K. The Effect of Transition from Traditional to Urban Life-  
27 Style on the Insulin Secretory Response in Australian Aborigines. *Diabetes Care* 1980;**3**:31–  
28 7. doi:10.2337/diacare.3.1.31
- 29 56 O’dea K. Marked Improvement in Carbohydrate and Lipid Metabolism in Diabetic  
30 Australian Aborigines After Temporary Reversion to Traditional Lifestyle. *Diabetes*  
31 1984;**33**:596–603. doi:10.2337/diab.33.6.596
- 32 57 Gurung OP, Rawal N, Bista PB. *Raute of Nepal*. First edition. Kathmandu, Nepal: : Central  
33 Department of Sociology/Anthropology, Tribhuvan University 2014.
- 34 58 Paudel M. *Resistance and change. A case study of economic changes and its effect on*  
35 *language, food habits and dress of the nomadic hunting-gathering Raute of Nepal.*  
36 2016. <https://hdl.handle.net/10037/9783>



- 1 59 Donders I, Barriocanal C. The Influence of Markets on the Nutrition Transition of Hunter-  
2 Gatherers: Lessons from the Western Amazon. *Int J Environ Res Public Health*  
3 2020;**17**:6307. doi:10.3390/ijerph17176307
- 4 60 DiBello JR, McGarvey ST, Kraft P, *et al.* Dietary Patterns Are Associated with Metabolic  
5 Syndrome in Adult Samoans. *J Nutr* 2009;**139**:1933–43. doi:10.3945/jn.109.107888
- 6 61 LaMonica LC, McGarvey ST, Rivara AC, *et al.* Cascades of diabetes and hypertension care  
7 in Samoa: Identifying gaps in the diagnosis, treatment, and control continuum – a cross-  
8 sectional study. *Lancet Reg Health - West Pac* 2022;**18**:100313.  
9 doi:10.1016/j.lanwpc.2021.100313
- 10 62 Port Lourenço AE, Ventura Santos R, Orellana JDY, *et al.* Nutrition transition in Amazonia:  
11 Obesity and socioeconomic change in the Suruí Indians from Brazil. *Am J Hum Biol*  
12 2008;**20**:564–71. doi:10.1002/ajhb.20781
- 13 63 Ramachandran A, Snehalatha C. Rising Burden of Obesity in Asia. *J Obes* 2010;**2010**:1–8.  
14 doi:10.1155/2010/868573
- 15 64 Knight JK, Salali GD, Sikka G, *et al.* Quantifying patterns of alcohol consumption and its  
16 effects on health and wellbeing among BaYaka hunter-gatherers: A mixed-methods cross-  
17 sectional study. *PLOS ONE* 2021;**16**:e0258384. doi:10.1371/journal.pone.0258384
- 18 65 Pollom TR, Herlosky KN, Mabulla IA, *et al.* Changes in Juvenile Foraging Behavior among  
19 the Hadza of Tanzania during Early Transition to a Mixed-Subsistence Economy. *Hum Nat*  
20 2020;**31**:123–40. doi:10.1007/s12110-020-09364-7
- 21 [dataset] 66 Koirala, Tapendra, BC, Udaya Bahadur, Shrestha, Carmina, *et al.* Arterial  
22 hypertension and its covariates among nomadic Raute hunter-gatherers of Western Nepal: a  
23 mixed-method study. Figshare Digit. Repos. 2022.  
24 doi:10.6084/M9.FIGSHARE.20358837.V2

25

## 26 **Footnotes**

27 **Contributors:** TK, UBB, SP, and UP conceptualized the study. TK, UBB, CS, and UP  
28 developed the study protocol and contributed to the acquisition of the quantitative data. UBB and  
29 TK were involved in acquiring qualitative data. The data was analyzed by TK, SP, CS, and RD,  
30 interpreted by all the authors, and visualized by TK and SP. TK, CS, and UP prepared the first  
31 draft of the manuscript. RD and MS supervised the study, and reviewed and revised the

1 manuscript for critically important intellectual content. All authors reviewed and approved the  
2 final version. TK is responsible for the overall content as guarantor.

3 **Funding:** This research received no specific grant from any funding agency in the public,  
4 commercial or not-for-profit sectors.

5 **Map disclaimer:** The inclusion of any map (including the depiction of any boundaries therein),  
6 or of any geographic or locational reference, does not imply the expression of any opinion  
7 whatsoever on the part of BMJ concerning the legal status of any country, territory, jurisdiction  
8 or area or of its authorities. Any such expression remains solely that of the relevant source and is  
9 not endorsed by BMJ. Maps are provided without any warranty of any kind, either express or  
10 implied.

11 **Competing interest:** None declared.

12 **Provenance and peer review:** Not commissioned; externally peer reviewed.

# STUDY AREA MAP SHOWING DATA COLLECTION SITES

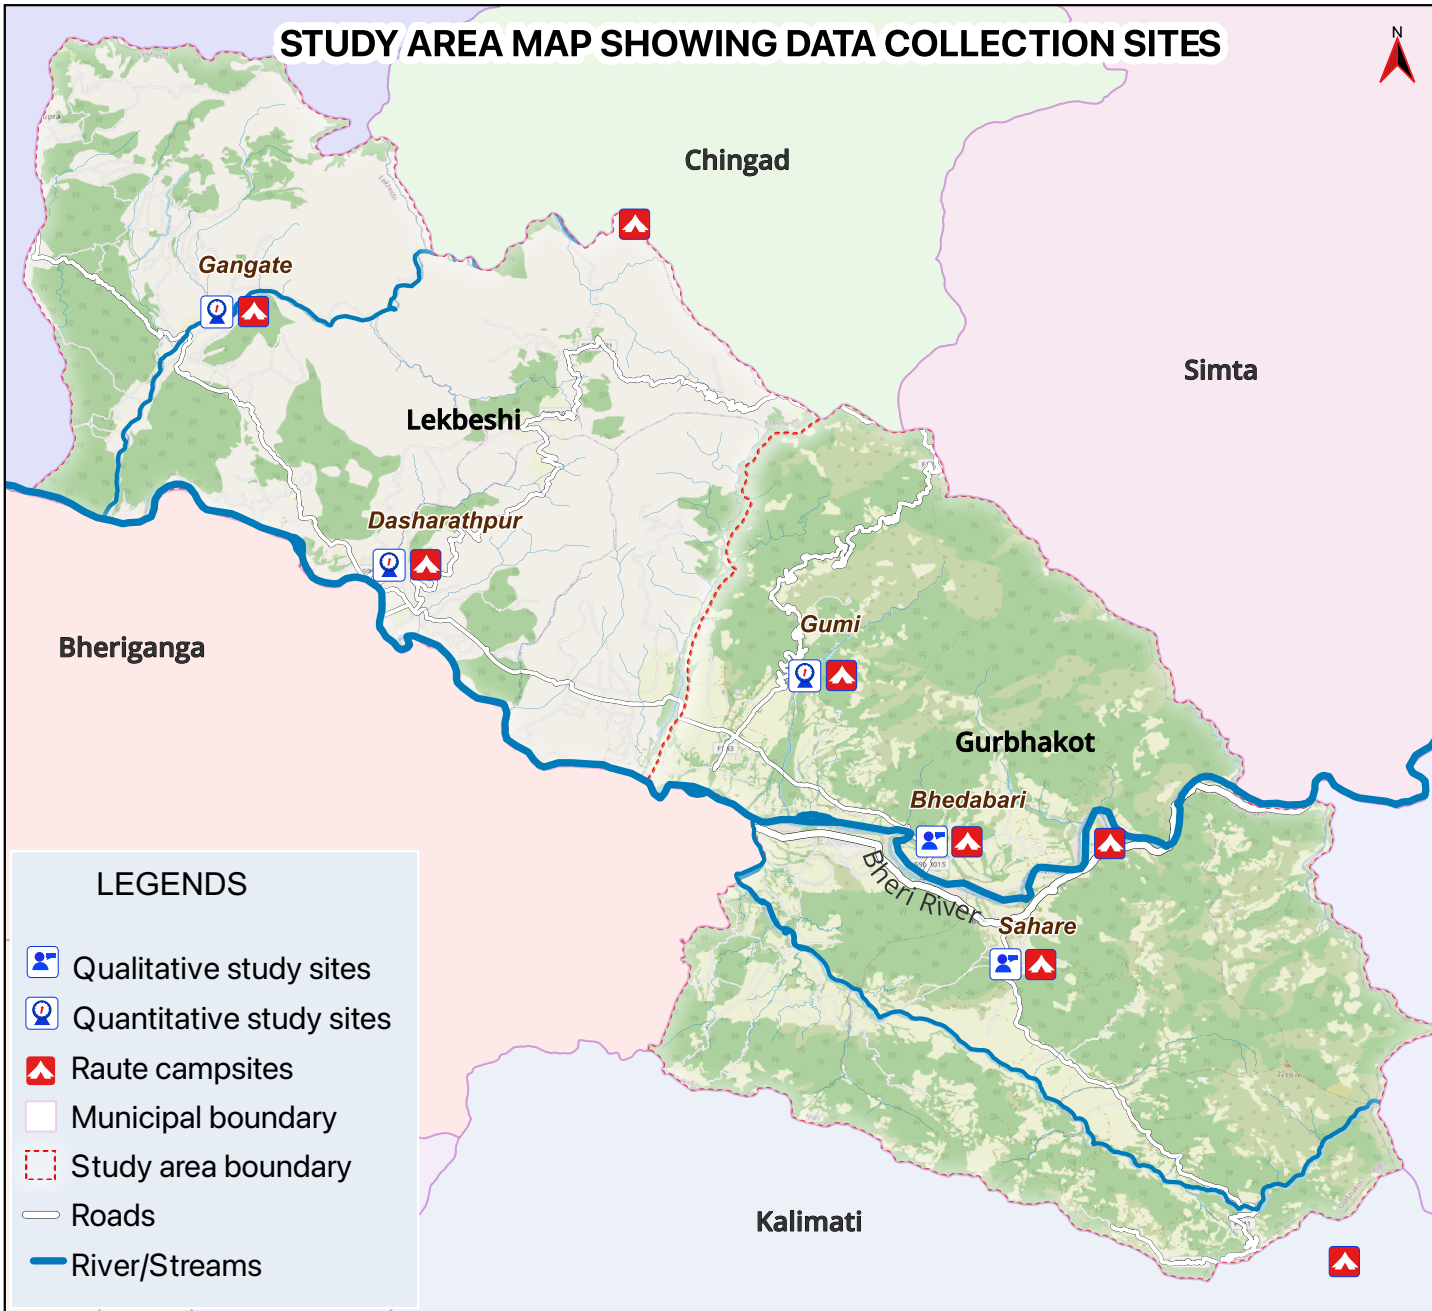

# NEPAL BY PROVINCES

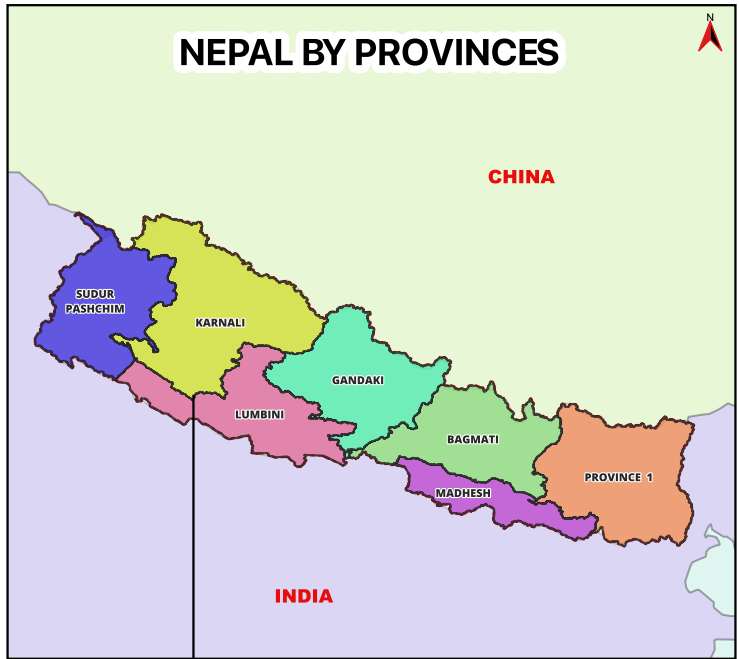

# KARNALI PROVINCE BY DISTRICTS

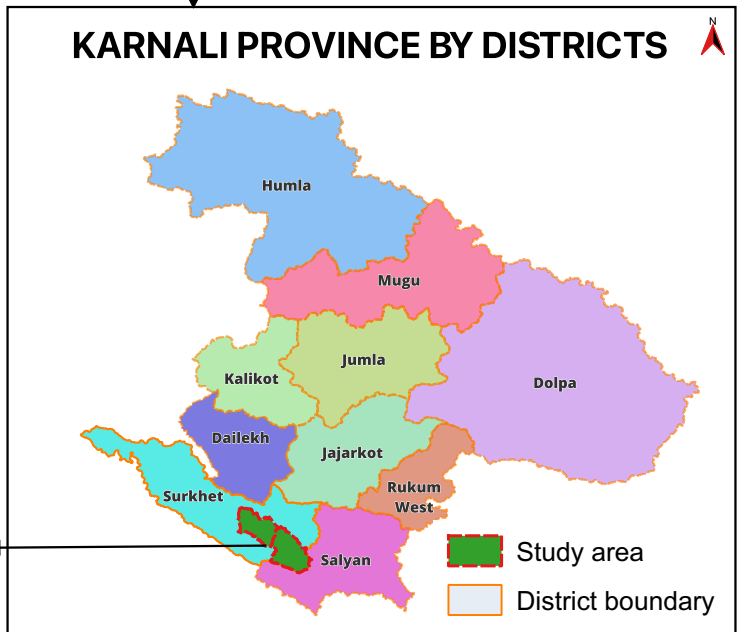

**A** Systolic blood pressure by age and sex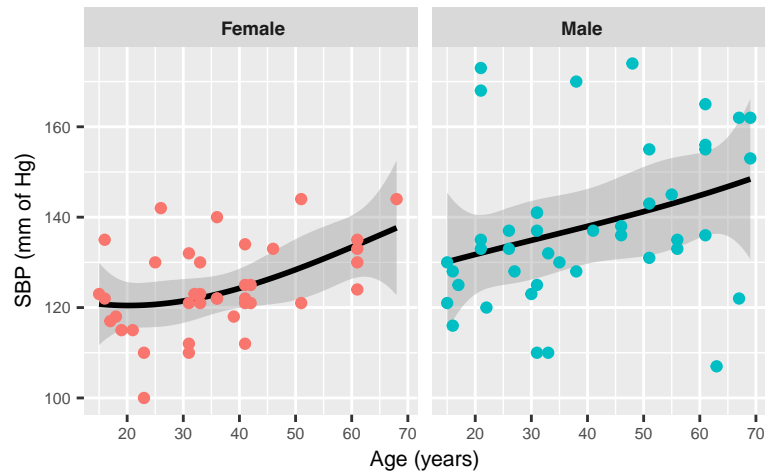**B** Diastolic blood pressure by age and sex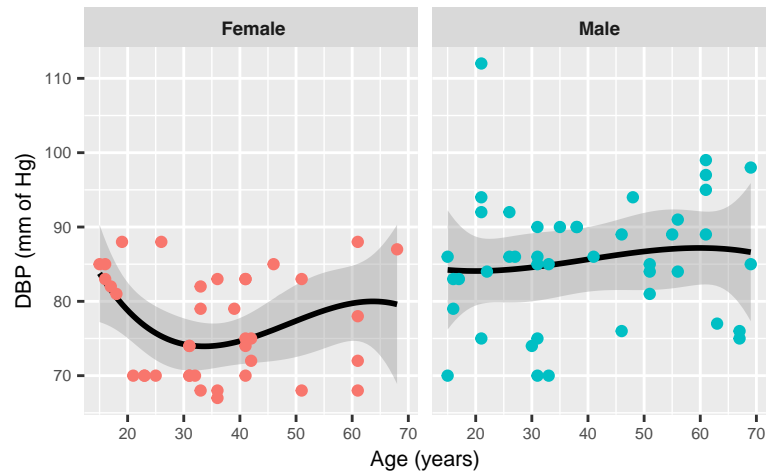**C** Mean arterial pressure by age and sex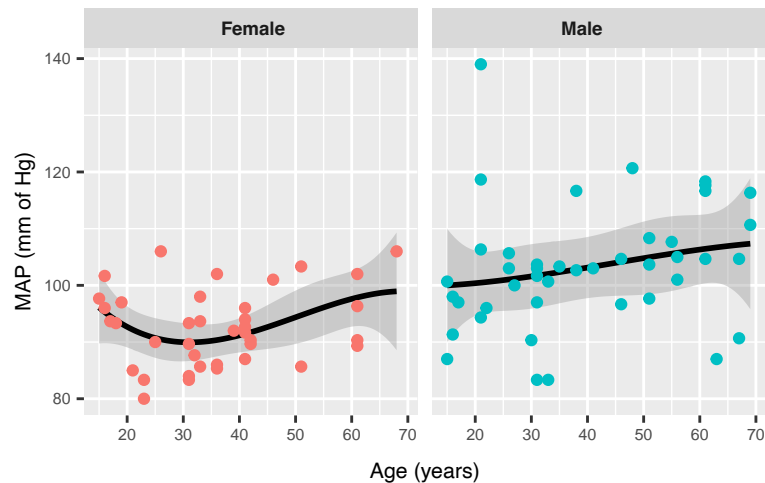**D** Blood pressure categories by age groups and sex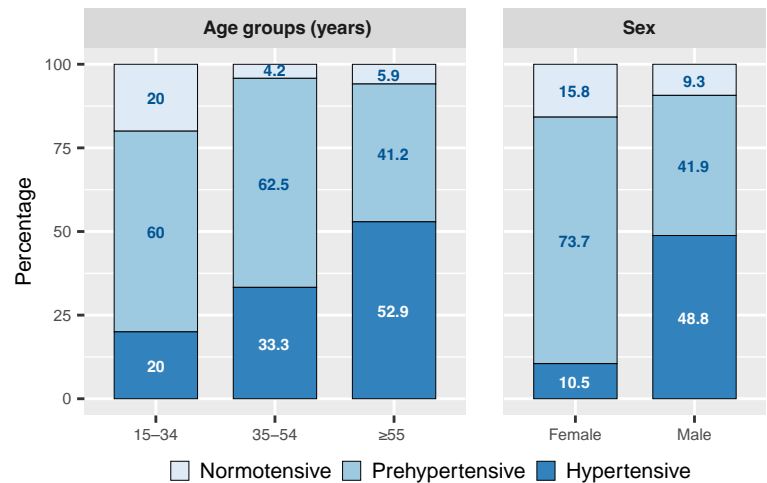

Source: https://medrxiv.org/content/10.1101/2022.07.28.22277961v3.full.pdf
